# Supplementary material for: Predicting bacterial transport through saturated porous media using an automated machine learning model
Source: PubMed Central journal article supplement (PMC10206036; doi:10.3389/fmicb.2023.1152059), 2023-05-10
Supplement: Data_Sheet_1.pdf [file Data_Sheet_1.pdf]

## Supplementary Material

Table S1: Collected datasets

| Paper No. | Concentration (cell/ml) | Ionic strength (mM) | Velocity (cm/h) | L (cm) | Porous media Type | Median grain size ( $\mu\text{m}$ ) | Saturated hydraulic conductivity (cm/h) | Organic matter content (%) | k temporal removal rate (h <sup>-1</sup> ) | $\lambda$ spatial removal rate (cm <sup>-1</sup> ) |
|-----------|-------------------------|---------------------|-----------------|--------|-------------------|-------------------------------------|-----------------------------------------|----------------------------|--------------------------------------------|----------------------------------------------------|
| 1         | 1.25E+07                | 1                   | 16.67           | 10     | sand              | 335                                 |                                         | 0                          | 0.17563598                                 | 0.01053605                                         |
|           | 1.25E+07                | 10                  | 16.67           | 10     | sand              | 335                                 |                                         | 0                          | 0.25142176                                 | 0.01508229                                         |
|           | 1.25E+07                | 100                 | 16.67           | 10     | sand              | 335                                 |                                         | 0                          | 0.3719803                                  | 0.02231436                                         |
| 2         | 1.60E+07                | 100                 | 31.84           | 10     | sand              | 363                                 |                                         | 0                          | 2.08210187                                 | 0.06539265                                         |
| 3         | 1.00E+08                | 100                 | 8.7             | 10     | sand              | 440                                 |                                         | 0                          | 1.20607609                                 | 0.13862944                                         |
|           | 1.00E+08                | 100                 | 13              | 10     | sand              | 440                                 |                                         | 0                          | 0.90109133                                 | 0.06931472                                         |
| 4         | 2.00E+08                | 0.0055              | 15.3            | 30     | sand              | 1000                                |                                         | 0                          | 0.18                                       | 0.01176471                                         |
|           | 2.00E+08                | 0.0055              | 15.3            | 30     | sand              | 1000                                |                                         | 0                          | 0.216                                      | 0.01411765                                         |
|           | 2.00E+08                | 0.0055              | 15.3            | 30     | sand              | 1000                                |                                         | 0                          | 0.138                                      | 0.00901961                                         |
|           | 2.00E+08                | 0.0055              | 15.3            | 30     | sand              | 1000                                |                                         | 0                          | 0.102                                      | 0.00666667                                         |
| 5         | 1.00E+08                | 10                  | 4.16            | 11     | sand              | 213                                 |                                         | 0                          | 0.6894                                     | 0.16572115                                         |
|           | 1.00E+08                | 10                  | 20.8            | 11     | sand              | 213                                 |                                         | 0                          | 1.44                                       | 0.06923077                                         |
|           | 1.00E+08                | 10                  | 208             | 11     | sand              | 213                                 |                                         | 0                          | 1.4832                                     | 0.00713077                                         |
|           | 1.00E+08                | 30                  | 4.16            | 11     | sand              | 213                                 |                                         | 0                          | 1.368                                      | 0.32884615                                         |
|           | 1.00E+08                | 30                  | 20.8            | 11     | sand              | 213                                 |                                         | 0                          | 1.602                                      | 0.07701923                                         |
|           | 1.00E+08                | 30                  | 208             | 11     | sand              | 213                                 |                                         | 0                          | 2.94                                       | 0.01413462                                         |

|    |          |     |       |    |           |      |      |      |            |            |
|----|----------|-----|-------|----|-----------|------|------|------|------------|------------|
|    | 1.00E+08 | 50  | 4.16  | 11 | sand      | 213  |      | 0    | 1.74       | 0.41826923 |
|    | 1.00E+08 | 50  | 20.8  | 11 | sand      | 213  |      | 0    | 2.94       | 0.14134615 |
|    | 1.00E+08 | 50  | 208   | 11 | sand      | 213  |      | 0    | 5.04       | 0.02423077 |
| 6  | 1.20E+07 | 10  | 16.67 | 10 | sand      | 509  |      | 0    | 0.33081771 | 0.01984509 |
|    | 1.20E+07 | 10  | 16.67 | 10 | sand      | 509  |      | 0    | 1.22352661 | 0.07339692 |
| 7  | 1.00E+03 | 10  | 8.03  | 25 | Disturbed | 320  | 28.5 | 0.68 | 0.07162908 | 0.00892574 |
|    | 1.00E+03 | 10  | 16.05 | 25 | Disturbed | 320  | 28.5 | 0.68 | 0.1274055  | 0.00793804 |
|    | 1.00E+03 | 10  | 32.10 | 25 | Disturbed | 320  | 28.5 | 0.68 | 0.17881249 | 0.00557048 |
|    | 1.00E+03 | 10  | 8.03  | 25 | sand      | 400  |      | 0    | 0.09234595 | 0.01150728 |
|    | 1.00E+03 | 10  | 16.05 | 25 | sand      | 400  |      | 0    | 0.22898531 | 0.014267   |
|    | 1.00E+03 | 10  | 32.10 | 25 | sand      | 400  |      | 0    | 0.6559001  | 0.02043302 |
| 8  | 1.25E+07 | 10  | 33.3  | 10 | sand      | 363  |      | 0    | 0.35085052 | 0.01053605 |
|    | 1.25E+07 | 50  | 33.3  | 10 | sand      | 363  |      | 0    | 2.30818011 | 0.06931472 |
| 9  | 1.00E+08 | 1   | 74.64 | 20 | sand      | 600  |      | 0    | 0.31118016 | 0.00416908 |
|    | 1.00E+08 | 20  | 74.64 | 20 | sand      | 600  |      | 0    | 0.39320544 | 0.00526803 |
|    | 1.00E+08 | 100 | 74.64 | 20 | sand      | 600  |      | 0    | 0.56287102 | 0.00754114 |
| 10 | 1.00E+08 | 0.1 | 36.3  | 17 | sand      | 1050 |      | 0    | 2.07734455 | 0.05722712 |
| 11 | 1.00E+08 | 150 | 4.77  | 15 | sand      | 363  |      | 0    | 0.16297299 | 0.03416625 |
|    | 1.00E+08 | 150 | 4.77  | 15 | sand      | 256  |      | 0    | 0.19011217 | 0.0398558  |
|    | 1.00E+08 | 150 | 4.77  | 15 | sand      | 128  |      | 0    | 0.22361681 | 0.04687983 |
|    | 1.00E+08 | 150 | 4.77  | 15 | sand      | 91   |      | 0    | 0.25605255 | 0.05367978 |

|    |          |        |       |    |      |     |   |            |            |
|----|----------|--------|-------|----|------|-----|---|------------|------------|
| 12 | 2.00E+08 | 10     | 33.3  | 10 | sand | 400 | 0 | 0.97578883 | 0.02930297 |
|    | 2.00E+08 | 50     | 33.3  | 10 | sand | 400 | 0 | 1.57578517 | 0.04732088 |
| 13 | 1.35E+07 | 5      | 16.67 | 10 | sand | 550 | 0 | 0.47956601 | 0.02876821 |
|    | 1.35E+07 | 25     | 16.67 | 10 | sand | 550 | 0 | 0.71811512 | 0.04307829 |
|    | 1.35E+07 | 5      | 16.67 | 10 | sand | 550 | 0 | 0.08550592 | 0.00512933 |
|    | 1.35E+07 | 25     | 16.67 | 10 | sand | 550 | 0 | 0.25142176 | 0.01508229 |
|    | 1.35E+08 | 5      | 16.67 | 10 | sand | 550 | 0 | 0.3719803  | 0.02231436 |
|    | 1.35E+08 | 25     | 16.67 | 10 | sand | 550 | 0 | 0.54761628 | 0.03285041 |
|    | 1.35E+08 | 5      | 16.67 | 10 | sand | 550 | 0 | 1.09009542 | 0.06539265 |
|    | 1.35E+08 | 25     | 16.67 | 10 | sand | 550 | 0 | 1.33111233 | 0.07985077 |
| 14 | 4.07E+07 | 17.11  | 108   | 12 | sand | 150 | 0 | 1.18123458 | 0.01093736 |
|    | 4.23E+07 | 85.55  | 108   | 12 | sand | 150 | 0 | 3.17158548 | 0.02936653 |
|    | 3.97E+07 | 171.1  | 108   | 12 | sand | 150 | 0 | 19.9476666 | 0.18470062 |
|    | 3.81E+07 | 256.65 | 108   | 12 | sand | 150 | 0 | 31.864135  | 0.29503829 |
|    | 4.33E+07 | 85.55  | 108   | 12 | sand | 150 | 0 | 4.77466431 | 0.04420985 |
|    | 4.11E+07 | 171.1  | 108   | 12 | sand | 150 | 0 | 13.0335279 | 0.12068081 |
|    | 3.91E+07 | 256.65 | 108   | 12 | sand | 150 | 0 | 16.1619074 | 0.14964729 |
|    | 3.03E+07 | 256.65 | 108   | 12 | sand | 150 | 0 | 16.7210934 | 0.15482494 |
|    | 4.42E+07 | 17.11  | 108   | 12 | sand | 350 | 0 | 0.09045302 | 0.00083753 |
|    | 3.72E+07 | 42.775 | 108   | 12 | sand | 350 | 0 | 0.24634077 | 0.00228093 |
|    | 4.14E+07 | 85.55  | 108   | 12 | sand | 350 | 0 | 0.66281886 | 0.00613721 |

|          |         |     |    |      |     |   |            |            |
|----------|---------|-----|----|------|-----|---|------------|------------|
| 4.37E+07 | 128.325 | 108 | 12 | sand | 350 | 0 | 0.47111832 | 0.00436221 |
| 3.81E+07 | 171.1   | 108 | 12 | sand | 350 | 0 | 1.13006901 | 0.0104636  |
| 2.54E+07 | 213.875 | 108 | 12 | sand | 350 | 0 | 1.11987071 | 0.01036917 |
| 4.62E+07 | 230.985 | 108 | 12 | sand | 350 | 0 | 3.01925463 | 0.02795606 |
| 3.42E+07 | 256.65  | 108 | 12 | sand | 350 | 0 | 4.3459763  | 0.04024052 |
| 3.62E+07 | 256.65  | 108 | 12 | sand | 350 | 0 | 4.3751971  | 0.04051108 |
| 4.72E+07 | 342.2   | 108 | 12 | sand | 350 | 0 | 8.405511   | 0.07782881 |
| 3.71E+07 | 85.55   | 108 | 12 | sand | 350 | 0 | 0.9682669  | 0.00896543 |
| 4.81E+07 | 171.1   | 108 | 12 | sand | 350 | 0 | 1.66612936 | 0.01542712 |
| 2.97E+07 | 256.65  | 108 | 12 | sand | 350 | 0 | 2.21310485 | 0.02049171 |
| 3.57E+07 | 342.2   | 108 | 12 | sand | 350 | 0 | 3.57747245 | 0.03312474 |
| 3.13E+07 | 342.2   | 108 | 12 | sand | 350 | 0 | 7.14665789 | 0.06617276 |
| 4.01E+07 | 342.2   | 108 | 12 | sand | 350 | 0 | 5.76499257 | 0.05337956 |
| 4.37E+07 | 17.11   | 108 | 12 | sand | 710 | 0 | 0.0090045  | 8.3375E-05 |
| 3.58E+07 | 171.1   | 108 | 12 | sand | 710 | 0 | 1.87429445 | 0.01735458 |
| 4.01E+07 | 256.65  | 108 | 12 | sand | 710 | 0 | 4.4634331  | 0.04132808 |
| 3.61E+07 | 342.2   | 108 | 12 | sand | 710 | 0 | 3.94654466 | 0.03654208 |
| 3.65E+07 | 85.55   | 108 | 12 | sand | 710 | 0 | 1.50512327 | 0.01393633 |
| 2.38E+07 | 171.1   | 108 | 12 | sand | 710 | 0 | 2.1101158  | 0.01953811 |
| 2.93E+07 | 256.65  | 108 | 12 | sand | 710 | 0 | 2.121501   | 0.01964353 |
| 4.33E+07 | 342.2   | 108 | 12 | sand | 710 | 0 | 4.3751971  | 0.04051108 |

|    |          |       |       |      |      |      |   |            |            |
|----|----------|-------|-------|------|------|------|---|------------|------------|
|    | 2.17E+07 | 342.2 | 108   | 12   | sand | 710  | 0 | 5.18628086 | 0.04802112 |
| 15 | 1.50E+07 | 20    | 16.67 | 10   | sand | 319  | 0 | 0.50194219 | 0.03011051 |
| 16 | 3.00E+08 | 1     | 2.93  | 12   | sand | 205  | 0 | 0.05448422 | 0.0185953  |
|    | 3.00E+08 | 10    | 2.93  | 12   | sand | 205  | 0 | 0.07024237 | 0.02397351 |
|    | 3.00E+08 | 100   | 2.93  | 12   | sand | 205  | 0 | 0.22372765 | 0.07635756 |
| 17 | 9.08E+08 | 0.1   | 71.31 | 17   | sand | 395  | 0 | 3.20314258 | 0.04491586 |
|    | 5.62E+08 | 0.1   | 73.99 | 17   | sand | 395  | 0 | 3.45628113 | 0.04671018 |
|    | 7.08E+08 | 0.1   | 57.58 | 17   | sand | 1030 | 0 | 3.1721728  | 0.05508785 |
|    | 8.40E+08 | 0.1   | 57.72 | 17   | sand | 1030 | 0 | 2.96179119 | 0.05131023 |
| 18 | 5.00E+07 | 25    | 16.67 | 10   | sand | 509  | 0 | 1.09009542 | 0.06539265 |
| 19 | 1.00E+07 | 10    | 33.3  | 20   | sand | 509  | 0 | 0.47899065 | 0.0143841  |
|    | 1.00E+07 | 20    | 33.3  | 20   | sand | 509  | 0 | 0.74306803 | 0.02231436 |
|    | 1.00E+07 | 30    | 33.3  | 20   | sand | 509  | 0 | 1.05707232 | 0.03174391 |
| 20 | 2.50E+07 | 3     | 133   | 7.35 | sand | 275  | 0 | 1.44       | 0.01082707 |
|    | 2.50E+07 | 10    | 133   | 7.35 | sand | 275  | 0 | 2.16       | 0.0162406  |
|    | 2.50E+07 | 30    | 133   | 7.35 | sand | 275  | 0 | 10.8       | 0.08120301 |
|    | 2.50E+07 | 50    | 133   | 7.35 | sand | 275  | 0 | 18         | 0.13533835 |
|    | 2.50E+07 | 100   | 133   | 7.35 | sand | 275  | 0 | 46.8       | 0.3518797  |
|    | 2.50E+07 | 300   | 133   | 7.35 | sand | 275  | 0 | 54         | 0.40601504 |
|    | 2.50E+07 | 10    | 133   | 7.35 | sand | 275  | 0 | 1.512      | 0.01136842 |
|    | 2.50E+07 | 30    | 133   | 7.35 | sand | 275  | 0 | 2.52       | 0.01894737 |

|    |          |     |       |      |      |     |   |            |            |
|----|----------|-----|-------|------|------|-----|---|------------|------------|
|    | 2.50E+07 | 50  | 133   | 7.35 | sand | 275 | 0 | 7.2        | 0.05413534 |
|    | 2.50E+07 | 100 | 133   | 7.35 | sand | 275 | 0 | 36         | 0.27067669 |
|    | 2.50E+07 | 300 | 133   | 7.35 | sand | 275 | 0 | 54         | 0.40601504 |
| 21 | 1.70E+08 | 14  | 5.57  | 15   | sand | 710 | 0 | 0.09129242 | 0.01639337 |
|    | 1.70E+08 | 14  | 19.16 | 15   | sand | 710 | 0 | 0.24726791 | 0.01290565 |
|    | 1.70E+08 | 14  | 35.64 | 15   | sand | 710 | 0 | 0.52716714 | 0.01479296 |
|    | 1.70E+08 | 14  | 4.22  | 15   | sand | 360 | 0 | 0.17191206 | 0.04070973 |
|    | 1.70E+08 | 14  | 17.84 | 15   | sand | 360 | 0 | 0.37425062 | 0.02098072 |
|    | 1.70E+08 | 14  | 33.79 | 15   | sand | 360 | 0 | 0.86553819 | 0.02561286 |
|    | 1.70E+08 | 14  | 4.81  | 15   | sand | 240 | 0 | 0.76586585 | 0.15906445 |
|    | 1.70E+08 | 14  | 17.53 | 15   | sand | 240 | 0 | 1.01104671 | 0.05767483 |
|    | 1.70E+08 | 14  | 3.05  | 10   | sand | 150 | 0 | 1.77404966 | 0.5809143  |
|    | 1.70E+08 | 14  | 17.95 | 15   | sand | 150 | 0 | 2.42281809 | 0.13499689 |
|    | 1.70E+08 | 14  | 30.34 | 10   | sand | 150 | 0 | 2.29095424 | 0.07550226 |
| 22 | 1.00E+08 | 20  | 41.67 | 6.8  | sand | 280 | 0 | 0.49       | 0.01176    |
|    | 1.00E+08 | 20  | 41.67 | 6.8  | sand | 280 | 0 | 0.54       | 0.01296    |
|    | 1.00E+08 | 20  | 41.67 | 6.8  | sand | 280 | 0 | 0.7        | 0.0168     |
|    | 1.00E+08 | 20  | 20.83 | 6.8  | sand | 280 | 0 | 0.29       | 0.01392    |
|    | 1.00E+08 | 20  | 20.83 | 6.8  | sand | 280 | 0 | 0.27       | 0.01296    |
|    | 1.00E+08 | 20  | 20.83 | 6.8  | sand | 280 | 0 | 0.29       | 0.01392    |
|    | 1.00E+08 | 20  | 4.17  | 6.8  | sand | 280 | 0 | 0.1        | 0.024      |

|    |          |     |       |     |      |      |   |            |            |
|----|----------|-----|-------|-----|------|------|---|------------|------------|
|    | 1.00E+08 | 20  | 4.17  | 6.8 | sand | 280  | 0 | 0.05       | 0.012      |
|    | 1.00E+08 | 20  | 4.17  | 6.8 | sand | 280  | 0 | 0.04       | 0.0096     |
| 23 | 1.00E+08 | 5   | 4.17  | 5   | sand | 213  | 0 | 0.08965434 | 0.02151704 |
|    | 1.00E+08 | 10  | 4.17  | 5   | sand | 213  | 0 | 0.25770521 | 0.06184925 |
|    | 1.00E+08 | 20  | 4.17  | 5   | sand | 213  | 0 | 0.33124745 | 0.07949939 |
| 24 | 1.15E+06 | 20  | 12    | 10  | sand | 420  | 0 | 0.37765289 | 0.03147107 |
| 25 | 4.00E+07 | 165 | 18.6  | 15  | sand | 774  | 0 | 3.438      | 0.18483871 |
|    | 4.00E+07 | 165 | 18.6  | 15  | sand | 774  | 0 | 3.06       | 0.16451613 |
| 26 | 1.94E+08 | 2   | 78.46 | 30  | sand | 513  | 0 | 0.1259056  | 0.00160468 |
|    | 1.98E+08 | 2   | 24.62 | 30  | sand | 1440 | 0 | 0.03435012 | 0.00139547 |
|    | 2.00E+08 | 2   | 24.62 | 30  | sand | 513  | 0 | 0.0464167  | 0.00188568 |
|    | 1.88E+08 | 2   | 24.62 | 30  | sand | 181  | 0 | 0.03178735 | 0.00129136 |
| 27 | 4.00E+07 | 8.4 | 18.6  | 15  | sand | 780  | 0 | 0.05061927 | 0.00272147 |
|    | 4.00E+07 | 168 | 18.6  | 15  | sand | 780  | 0 | 0.53417082 | 0.02871886 |
|    | 4.00E+07 | 8.4 | 18.6  | 15  | sand | 780  | 0 | 0.02505136 | 0.00134685 |
|    | 4.00E+07 | 168 | 18.6  | 15  | sand | 780  | 0 | 0.57292397 | 0.03080236 |
| 28 | 4.00E+07 | 1   | 18.6  | 15  | sand | 774  | 0 | 0.51523915 | 0.02770103 |
|    | 4.00E+07 | 3   | 18.6  | 15  | sand | 774  | 0 | 0.8595025  | 0.04620981 |
|    | 4.00E+07 | 10  | 18.6  | 15  | sand | 774  | 0 | 1.01801588 | 0.05473204 |
|    | 4.00E+07 | 30  | 18.6  | 15  | sand | 774  | 0 | 1.0757007  | 0.05783337 |
|    | 4.00E+07 | 100 | 18.6  | 15  | sand | 774  | 0 | 0.91012178 | 0.04893128 |

|    |          |     |      |    |      |      |   |            |            |
|----|----------|-----|------|----|------|------|---|------------|------------|
|    | 4.00E+07 | 1   | 18.6 | 15 | sand | 774  | 0 | 0.55339601 | 0.02975247 |
|    | 4.00E+07 | 3   | 18.6 | 15 | sand | 774  | 0 | 0.91012178 | 0.04893128 |
|    | 4.00E+07 | 10  | 18.6 | 15 | sand | 774  | 0 | 0.936228   | 0.05033484 |
|    | 4.00E+07 | 30  | 18.6 | 15 | sand | 774  | 0 | 1.0757007  | 0.05783337 |
|    | 4.00E+07 | 100 | 18.6 | 15 | sand | 774  | 0 | 1.04652289 | 0.05626467 |
|    | 4.00E+07 | 1   | 18.6 | 15 | sand | 774  | 0 | 0.276698   | 0.01487624 |
|    | 4.00E+07 | 3   | 18.6 | 15 | sand | 774  | 0 | 0.55339601 | 0.02975247 |
|    | 4.00E+07 | 10  | 18.6 | 15 | sand | 774  | 0 | 0.51523915 | 0.02770103 |
|    | 4.00E+07 | 30  | 18.6 | 15 | sand | 774  | 0 | 0.59276439 | 0.03186905 |
|    | 4.00E+07 | 100 | 18.6 | 15 | sand | 774  | 0 | 0.59276439 | 0.03186905 |
|    | 4.00E+07 | 1   | 18.6 | 15 | sand | 774  | 0 | 0.276698   | 0.01487624 |
|    | 4.00E+07 | 3   | 18.6 | 15 | sand | 774  | 0 | 0.63342377 | 0.03405504 |
|    | 4.00E+07 | 10  | 18.6 | 15 | sand | 774  | 0 | 0.49659218 | 0.0266985  |
|    | 4.00E+07 | 30  | 18.6 | 15 | sand | 774  | 0 | 0.61292744 | 0.03295309 |
|    | 4.00E+07 | 100 | 18.6 | 15 | sand | 774  | 0 | 0.55339601 | 0.02975247 |
| 29 | 2.00E+08 | 5.3 | 10.6 | 30 | sand | 1000 | 0 | 0.366      | 0.0345283  |
| 30 | 5.00E+07 | 10  | 39.6 | 10 | sand | 205  | 0 | 2.46       | 0.06212121 |
|    | 5.00E+07 | 10  | 39.6 | 10 | sand | 205  | 0 | 3.6        | 0.09090909 |
|    | 5.00E+07 | 30  | 39.6 | 10 | sand | 205  | 0 | 7.26       | 0.18333333 |
|    | 5.00E+07 | 30  | 39.6 | 10 | sand | 205  | 0 | 5.4        | 0.13636364 |
|    | 5.00E+07 | 50  | 39.6 | 10 | sand | 205  | 0 | 17.4       | 0.43939394 |



|    |          |        |        |      |      |      |   |            |            |
|----|----------|--------|--------|------|------|------|---|------------|------------|
|    | 5.00E+07 | 50     | 39.6   | 10   | sand | 205  | 0 | 15         | 0.37878788 |
|    | 5.00E+07 | 100    | 39.6   | 10   | sand | 205  | 0 | 54         | 1.36363636 |
|    | 5.00E+07 | 100    | 39.6   | 10   | sand | 205  | 0 | 54.6       | 1.37878788 |
| 31 | 4.15E+08 | 0.0055 | 300.76 | 44   | sand | 1430 | 0 | 0.79655609 | 0.0026485  |
|    | 9.25E+08 | 0.0055 | 99.03  | 22   | sand | 1430 | 0 | 1.00441722 | 0.01014289 |
|    | 5.55E+08 | 0.0055 | 20.22  | 44   | sand | 288  | 0 | 4.97297674 | 0.24590405 |
|    | 3.74E+08 | 0.0055 | 25.03  | 44   | sand | 288  | 0 | 4.61460166 | 0.18435746 |
|    | 4.80E+08 | 0.0055 | 58.29  | 22   | sand | 288  | 0 | 4.63292958 | 0.07948636 |
|    | 4.21E+08 | 0.0055 | 47.24  | 22   | sand | 288  | 0 | 9.13570404 | 0.19338697 |
| 32 | 1.00E+08 | 10     | 33.3   | 10   | sand | 300  | 0 | 7.66760836 | 0.23025851 |
|    | 1.00E+08 | 1      | 33.3   | 10   | sand | 300  | 0 | 6.54715581 | 0.19661129 |
| 33 | 9.30E+07 | 1      | 175.8  | 13.6 | sand | 205  | 0 | 0.396      | 0.00225256 |
|    | 8.30E+07 | 1      | 175.8  | 14.2 | sand | 205  | 0 | 0.1044     | 0.00059386 |
|    | 1.10E+08 | 1      | 175.8  | 14   | sand | 205  | 0 | 0.612      | 0.00348123 |
|    | 3.20E+07 | 1      | 175.8  | 22.5 | sand | 205  | 0 | 0.2916     | 0.0016587  |
|    | 6.00E+07 | 3.2    | 175.8  | 3.2  | sand | 205  | 0 | 0.864      | 0.00491468 |
|    | 9.10E+07 | 3.2    | 175.8  | 11.9 | sand | 205  | 0 | 0.54       | 0.00307167 |
|    | 3.70E+07 | 3.2    | 175.8  | 11.9 | sand | 205  | 0 | 0.504      | 0.00286689 |
|    | 5.80E+07 | 3.2    | 175.8  | 11.7 | sand | 205  | 0 | 0.648      | 0.00368601 |
|    | 2.50E+07 | 10     | 175.8  | 10   | sand | 205  | 0 | 2.412      | 0.01372014 |
|    | 1.00E+08 | 10     | 175.8  | 14.1 | sand | 205  | 0 | 1.836      | 0.01044369 |

|    |          |      |       |      |      |     |   |            |            |
|----|----------|------|-------|------|------|-----|---|------------|------------|
|    | 7.90E+07 | 10   | 175.8 | 14.2 | sand | 205 | 0 | 1.332      | 0.00757679 |
|    | 8.30E+06 | 10   | 175.8 | 9.2  | sand | 205 | 0 | 1.476      | 0.0083959  |
|    | 1.10E+07 | 10   | 175.8 | 9.4  | sand | 205 | 0 | 2.268      | 0.01290102 |
|    | 1.00E+08 | 31.6 | 175.8 | 31.6 | sand | 205 | 0 | 8.28       | 0.04709898 |
|    | 6.20E+06 | 31.6 | 175.8 | 14.5 | sand | 205 | 0 | 10.8       | 0.06143345 |
|    | 1.00E+08 | 31.6 | 175.8 | 13.8 | sand | 205 | 0 | 5.04       | 0.02866894 |
|    | 2.00E+06 | 31.6 | 175.8 | 13.6 | sand | 205 | 0 | 9.72       | 0.0552901  |
|    | 9.10E+06 | 31.6 | 175.8 | 8.9  | sand | 205 | 0 | 8.28       | 0.04709898 |
|    | 8.20E+06 | 31.6 | 175.8 | 9.1  | sand | 205 | 0 | 10.08      | 0.05733788 |
|    | 1.30E+07 | 31.6 | 175.8 | 9.2  | sand | 205 | 0 | 6.48       | 0.03686007 |
|    | 8.40E+07 | 100  | 175.8 | 100  | sand | 205 | 0 | 68.4       | 0.3890785  |
|    | 9.80E+07 | 100  | 175.8 | 13.5 | sand | 205 | 0 | 75.6       | 0.43003413 |
|    | 1.10E+08 | 100  | 175.8 | 13.7 | sand | 205 | 0 | 57.6       | 0.32764505 |
|    | 1.80E+07 | 100  | 175.8 | 7.3  | sand | 205 | 0 | 68.4       | 0.3890785  |
|    | 7.10E+06 | 100  | 175.8 | 7.3  | sand | 205 | 0 | 54         | 0.30716724 |
|    | 1.80E+07 | 300  | 175.8 | 13.5 | sand | 205 | 0 | 111.6      | 0.63481229 |
| 34 | 2.00E+08 | 2    | 3.55  | 6    | sand | 463 | 0 | 1.57339552 | 0.44321001 |
|    | 2.00E+08 | 20   | 3.55  | 6    | sand | 463 | 0 | 2.07471342 | 0.58442632 |
|    | 2.00E+08 | 100  | 3.55  | 6    | sand | 463 | 0 | 2.4848255  | 0.69995085 |
|    | 2.00E+08 | 2    | 10.56 | 6    | sand | 463 | 0 | 1.21993904 | 0.11552453 |
|    | 2.00E+08 | 20   | 10.56 | 6    | sand | 463 | 0 | 1.84768694 | 0.17497035 |

|    |          |     |        |    |      |     |   |            |            |
|----|----------|-----|--------|----|------|-----|---|------------|------------|
|    | 2.00E+08 | 100 | 10.56  | 6  | sand | 463 | 0 | 2.66486481 | 0.25235462 |
|    | 2.00E+08 | 2   | 21.3   | 6  | sand | 463 | 0 | 1.02127136 | 0.04794701 |
|    | 2.00E+08 | 20  | 21.3   | 6  | sand | 463 | 0 | 2.05835566 | 0.09663642 |
|    | 2.00E+08 | 100 | 21.3   | 6  | sand | 463 | 0 | 1.31727607 | 0.06184395 |
| 35 | 5.00E+07 | 30  | 90     | 10 | sand | 205 | 0 | 2.00829196 | 0.02231436 |
|    | 5.00E+07 | 50  | 90     | 10 | sand | 205 | 0 | 7.59573063 | 0.08439701 |
|    | 5.00E+07 | 100 | 90     | 10 | sand | 205 | 0 | 35.208207  | 0.3912023  |
|    | 5.00E+07 | 30  | 90     | 10 | sand | 205 | 0 | 5.38053301 | 0.0597837  |
|    | 5.00E+07 | 50  | 90     | 10 | sand | 205 | 0 | 12.4766493 | 0.13862944 |
|    | 5.00E+07 | 100 | 90     | 10 | sand | 205 | 0 | 41.4465317 | 0.46051702 |
| 36 | 3.86E+07 | 0.2 | 195.48 | 5  | sand | 196 | 0 | 3.25988738 | 0.01667632 |
|    | 4.67E+07 | 0.2 | 167.04 | 2  | sand | 196 | 0 | 8.79971027 | 0.05268026 |
|    | 4.61E+07 | 0.2 | 194.76 | 1  | sand | 196 | 0 | 24.8968274 | 0.12783337 |
|    | 1.78E+08 | 0.2 | 194.76 | 1  | sand | 196 | 0 | 20.520014  | 0.10536052 |
|    | 1.20E+09 | 0.2 | 194.76 | 1  | sand | 196 | 0 | 9.98988201 | 0.05129329 |
|    | 4.74E+07 | 0.2 | 190.44 | 1  | sand | 196 | 0 | 17.9605258 | 0.09431068 |
|    | 4.32E+07 | 0.2 | 187.2  | 5  | sand | 83  | 0 | 6.52779081 | 0.03487068 |
|    | 4.54E+07 | 0.2 | 184.32 | 2  | sand | 83  | 0 | 11.7811235 | 0.06391669 |
|    | 6.45E+07 | 0.2 | 163.44 | 1  | sand | 83  | 0 | 6.67194678 | 0.04082199 |
|    | 1.39E+08 | 0.2 | 184.32 | 1  | sand | 83  | 0 | 13.3762301 | 0.07257069 |
|    | 5.90E+08 | 0.2 | 182.16 | 1  | sand | 83  | 0 | 5.54844924 | 0.03045921 |

|          |     |        |      |      |    |   |            |            |
|----------|-----|--------|------|------|----|---|------------|------------|
| 4.69E+07 | 0.2 | 179.28 | 1    | sand | 83 | 0 | 5.46072672 | 0.03045921 |
| 4.22E+07 | 0.2 | 174.24 | 5    | sand | 49 | 0 | 11.9351023 | 0.06849806 |
| 4.63E+07 | 0.2 | 174.24 | 2    | sand | 49 | 0 | 21.6459536 | 0.12423068 |
| 4.34E+07 | 0.2 | 154.44 | 1    | sand | 49 | 0 | 36.4049572 | 0.23572233 |
| 4.83E+07 | 0.2 | 117.36 | 5    | sand | 49 | 0 | 9.40000944 | 0.08009551 |
| 4.46E+07 | 0.2 | 77.04  | 5    | sand | 49 | 0 | 6.63750317 | 0.08615658 |
| 1.00E+05 | 0.2 | 149.4  | 5    | sand | 49 | 0 | 12.4156015 | 0.08310309 |
| 1.00E+04 | 0.2 | 154.44 | 5    | sand | 49 | 0 | 17.9094337 | 0.1159637  |
| 1.00E+03 | 0.2 | 149.4  | 5    | sand | 49 | 0 | 15.2634696 | 0.10216512 |
| 1.22E+08 | 0.2 | 181.8  | 1    | sand | 49 | 0 | 27.4196014 | 0.15082289 |
| 3.67E+09 | 0.2 | 164.16 | 1    | sand | 49 | 0 | 19.1301913 | 0.11653382 |
| 1.77E+07 | 0.2 | 164.16 | 0.25 | sand | 49 | 0 | 54.7516997 | 0.33352644 |
| 4.27E+07 | 0.2 | 165.96 | 1    | sand | 49 | 0 | 28.9356881 | 0.17435339 |
| 4.41E+07 | 0.2 | 166.32 | 5    | sand | 42 | 0 | 27.3090971 | 0.16419611 |
| 3.76E+07 | 0.2 | 171    | 2    | sand | 42 | 0 | 24.5968172 | 0.14384104 |
| 3.77E+07 | 0.2 | 156.6  | 1    | sand | 42 | 0 | 49.2837026 | 0.31471074 |
| 4.95E+07 | 0.2 | 112.32 | 5    | sand | 42 | 0 | 12.2367513 | 0.10894544 |
| 4.89E+07 | 0.2 | 68.4   | 5    | sand | 42 | 0 | 10.6229138 | 0.15530576 |
| 1.30E+05 | 0.2 | 132.12 | 5    | sand | 42 | 0 | 30.9473391 | 0.2342366  |
| 1.00E+03 | 0.2 | 132.12 | 5    | sand | 42 | 0 | 24.2120663 | 0.18325815 |
| 1.56E+08 | 0.2 | 171    | 1    | sand | 42 | 0 | 36.0332964 | 0.21072103 |

|    |          |        |        |      |      |      |   |            |            |
|----|----------|--------|--------|------|------|------|---|------------|------------|
|    | 9.01E+08 | 0.2    | 172.08 | 1    | sand | 42   | 0 | 32.0635938 | 0.18632958 |
|    | 4.80E+07 | 0.2    | 161.28 | 0.25 | sand | 42   | 0 | 97.2988626 | 0.60329156 |
|    | 4.38E+07 | 0.2    | 166.32 | 1    | sand | 42   | 0 | 61.7153115 | 0.37106368 |
| 37 | 1.00E+08 | 5      | 18.6   | 20   | sand | 120  | 0 | 0.76351191 | 0.04104903 |
|    | 1.00E+08 | 20     | 20.4   | 20   | sand | 120  | 0 | 2.16266881 | 0.10601318 |
|    | 1.00E+08 | 100    | 22.2   | 20   | sand | 120  | 0 | 4.34234554 | 0.19560115 |
|    | 1.00E+08 | 20     | 618    | 20   | sand | 710  | 0 | 0.62426366 | 0.00101014 |
|    | 1.00E+08 | 100    | 618    | 20   | sand | 710  | 0 | 2.57649172 | 0.00416908 |
| 38 | 1.00E+08 | 3      | 15     | 23   | sand | 260  | 0 | 1.1183468  | 0.07455645 |
|    | 1.00E+08 | 3      | 15     | 23   | sand | 260  | 0 | 0.93072806 | 0.06204854 |
| 39 | 6.91E+07 | 0.0055 | 156    | 10   | sand | 300  | 0 | 30.6713606 | 0.19661129 |
|    | 7.18E+07 | 0.0055 | 156    | 15   | sand | 300  | 0 | 26.2675779 | 0.16838191 |
|    | 6.71E+07 | 0.0055 | 156    | 20   | sand | 300  | 0 | 20.7422283 | 0.132963   |
|    | 6.87E+07 | 0.0055 | 156    | 25   | sand | 300  | 0 | 17.5556829 | 0.11253643 |
|    | 7.44E+07 | 0.0055 | 156    | 30   | sand | 300  | 0 | 15.5778078 | 0.09985774 |
|    | 7.19E+07 | 0.0055 | 156    | 10   | sand | 600  | 0 | 24.3461049 | 0.15606477 |
|    | 7.26E+07 | 0.0055 | 156    | 15   | sand | 600  | 0 | 21.2182966 | 0.13601472 |
|    | 7.29E+07 | 0.0055 | 156    | 20   | sand | 600  | 0 | 17.2167443 | 0.11036375 |
|    | 7.30E+07 | 0.0055 | 156    | 25   | sand | 600  | 0 | 15.0255806 | 0.09631782 |
|    | 6.75E+07 | 0.0055 | 156    | 30   | sand | 600  | 0 | 13.133789  | 0.08419095 |
|    | 7.28E+07 | 0.0055 | 156    | 10   | sand | 1000 | 0 | 21.626192  | 0.13862944 |

|    |          |        |      |      |      |      |   |            |            |
|----|----------|--------|------|------|------|------|---|------------|------------|
|    | 7.27E+07 | 0.0055 | 156  | 15   | sand | 1000 | 0 | 19.7300478 | 0.12647467 |
|    | 6.95E+07 | 0.0055 | 156  | 20   | sand | 1000 | 0 | 17.9601637 | 0.11512925 |
|    | 7.15E+07 | 0.0055 | 156  | 25   | sand | 1000 | 0 | 15.7605467 | 0.10102915 |
|    | 7.52E+07 | 0.0055 | 156  | 30   | sand | 1000 | 0 | 14.6297357 | 0.09378036 |
| 40 | 1.00E+09 | 10     | 110  | 37   | sand | 356  | 0 | 1.12796082 | 0.01025419 |
|    | 1.00E+09 | 10     | 110  | 57   | sand | 356  | 0 | 0.86256103 | 0.00784146 |
|    | 1.00E+09 | 10     | 110  | 77   | sand | 356  | 0 | 1.04979395 | 0.00954358 |
|    | 1.00E+09 | 10     | 110  | 107  | sand | 356  | 0 | 0.90205233 | 0.00820048 |
|    | 1.00E+09 | 10     | 110  | 147  | sand | 356  | 0 | 0.78962977 | 0.00717845 |
| 41 | 1.00E+08 | 10     | 292  | 600  | sand | 356  | 0 | 0.30202599 | 0.00103434 |
|    | 1.00E+08 | 10     | 292  | 1215 | sand | 356  | 0 | 0.26272891 | 0.00089976 |
|    | 1.00E+08 | 10     | 292  | 1900 | sand | 356  | 0 | 0.20791075 | 0.00071202 |
|    | 1.00E+08 | 10     | 292  | 2565 | sand | 356  | 0 | 0.20493594 | 0.00070184 |
| 42 | 1.31E+08 | 10     | 2.76 | 25.4 | sand | 532  | 0 | 0.02910816 | 0.01054643 |
|    | 1.57E+08 | 10     | 2.81 | 25.4 | sand | 532  | 0 | 0.01837061 | 0.00653758 |
| 43 | 3.00E+07 | 10     | 54   | 15   | sand | 387  | 0 | 3.69186159 | 0.06836781 |
|    | 3.00E+07 | 100    | 54   | 15   | sand | 387  | 0 | 2.63110972 | 0.04872425 |
| 44 | 4.00E+07 | 1      | 50.4 | 15   | sand | 254  | 0 | 0.69499157 | 0.01378952 |
|    | 4.00E+07 | 5      | 50.4 | 15   | sand | 254  | 0 | 1.0149002  | 0.02013691 |
|    | 4.00E+07 | 20     | 50.4 | 15   | sand | 254  | 0 | 2.93322812 | 0.05819897 |
|    | 4.00E+07 | 50     | 50.4 | 15   | sand | 254  | 0 | 7.91609208 | 0.15706532 |

|    |          |     |            |    |      |      |      |            |            |
|----|----------|-----|------------|----|------|------|------|------------|------------|
| 45 | 9.08E+08 | 0.1 | 71.3142857 | 17 | sand | 360  | 0    | 3.58434618 | 0.05026126 |
|    | 5.62E+08 | 0.1 | 73.9941691 | 17 | sand | 360  | 0    | 4.7850084  | 0.06466737 |
|    | 6.29E+08 | 0.1 | 74.3023256 | 17 | sand | 360  | 0    | 3.73452885 | 0.05026126 |
|    | 7.08E+08 | 0.1 | 57.5838926 | 17 | sand | 900  | 0    | 3.47939834 | 0.06042312 |
|    | 8.40E+08 | 0.1 | 57.7232143 | 17 | sand | 900  | 0    | 3.39688208 | 0.05884776 |
| 46 | 1.00E+07 | 10  | 139.8      | 10 | sand | 607  | 0    | 0.57390755 | 0.0041052  |
|    | 1.00E+07 | 10  | 139.8      | 10 | sand | 310  | 0    | 1.12052842 | 0.00801522 |
|    | 1.00E+07 | 10  | 21         | 10 | sand | 607  | 0    | 0.20837461 | 0.0099226  |
|    | 1.00E+07 | 10  | 21         | 10 | sand | 310  | 0    | 0.37978606 | 0.01808505 |
|    | 1.00E+07 | 32  | 139.8      | 10 | sand | 607  | 0    | 1.39936018 | 0.01000973 |
|    | 1.00E+07 | 32  | 139.8      | 10 | sand | 310  | 0    | 4.00465552 | 0.0286456  |
|    | 1.00E+07 | 32  | 21         | 10 | sand | 607  | 0    | 0.50283    | 0.02394429 |
|    | 1.00E+07 | 32  | 21         | 10 | sand | 310  | 0    | 1.69407045 | 0.08067002 |
| 47 | 1.00E+08 | 10  | 2.38       | 10 | sand | 300  | 0    | 0.31845995 | 0.1338067  |
|    | 1.00E+08 | 10  | 2.38       | 10 | sand | 300  | 0    | 0.37110545 | 0.15592666 |
| 48 | 1.30E+08 | 1.5 | 108.3      | 15 | sand | 327  | 0    | 1.43281578 | 0.01323006 |
| 49 | 3.00E+08 | 1   | 252        | 30 | sand | 1500 | 0.82 | 1.74011385 | 0.00690521 |
|    | 3.00E+08 | 5   | 252        | 30 | sand | 1500 | 0.82 | 3.61039909 | 0.01432698 |
|    | 3.00E+08 | 10  | 252        | 30 | sand | 1500 | 0.82 | 4.46010069 | 0.01769881 |
|    | 3.00E+08 | 50  | 252        | 30 | sand | 1500 | 0.82 | 6.09601761 | 0.02419055 |
|    | 3.00E+08 | 100 | 252        | 30 | sand | 1500 | 0.82 | 7.35262584 | 0.02917709 |

|    |          |        |      |    |             |      |       |            |            |            |
|----|----------|--------|------|----|-------------|------|-------|------------|------------|------------|
|    | 3.00E+08 | 1      | 252  | 30 | sand        | 1500 | 0.9   | 2.47335535 | 0.0098149  |            |
|    | 3.00E+08 | 50     | 252  | 30 | sand        | 1500 | 0.9   | 9.05986673 | 0.03595185 |            |
|    | 3.00E+08 | 1      | 252  | 30 | sand        | 1500 | 0.05  | 2.48277146 | 0.00985227 |            |
|    | 3.00E+08 | 50     | 252  | 30 | sand        | 1500 | 0.05  | 3.66931527 | 0.01456077 |            |
| 50 | 2.00E+08 | 10     | 6    | 5  | Intact soil |      | 0.674 | 3.71       | 1.25978655 | 0.20996442 |
|    | 2.00E+08 | 10     | 6    | 5  | Intact soil |      | 0.713 | 3.05       | 0.65367261 | 0.10894544 |
|    | 2.00E+08 | 10     | 6    | 5  | Intact soil |      | 1.017 | 2.55       | 0.23814113 | 0.03969019 |
|    | 2.00E+08 | 10     | 6    | 5  | Intact soil |      | 0.857 | 2.11       | 0.0120604  | 0.00201007 |
|    | 2.00E+08 | 10     | 6    | 5  | Disturbed   |      | 0.674 | 3.84       | 2.27654398 | 0.379424   |
|    | 2.00E+08 | 10     | 6    | 5  | Disturbed   |      | 0.713 | 3.35       | 0.95820924 | 0.15970154 |
|    | 2.00E+08 | 10     | 6    | 5  | Disturbed   |      | 1.017 | 2.86       | 0.37765289 | 0.06294215 |
|    | 2.00E+08 | 10     | 6    | 5  | Disturbed   |      | 0.857 | 2.47       | 0.22359549 | 0.03726592 |
| 51 | 2.00E+08 | 10     | 12   | 5  | Intact soil |      | 0.674 | 3.71       | 0.72265222 | 0.06022102 |
|    | 2.00E+08 | 10     | 12   | 5  | Intact soil |      | 0.713 | 3.05       | 0.47628225 | 0.03969019 |
|    | 2.00E+08 | 10     | 12   | 5  | Intact soil |      | 1.017 | 2.55       | 0.33422896 | 0.02785241 |
|    | 2.00E+08 | 10     | 12   | 5  | Intact soil |      | 0.857 | 2.11       | 0.02412081 | 0.00201007 |
|    | 2.00E+08 | 10     | 12   | 5  | Disturbed   |      | 0.674 | 3.84       | 2.5195731  | 0.20996442 |
|    | 2.00E+08 | 10     | 12   | 5  | Disturbed   |      | 0.857 | 2.47       | 0.02412081 | 0.00201007 |
| 52 | 2.00E+08 | 0.0055 | 15.3 | 30 | Disturbed   |      | 2.51  | 0.06       | 1.284      | 0.08392157 |
|    | 2.00E+08 | 0.0055 | 15.3 | 30 | Disturbed   |      | 2.51  | 0.06       | 1.392      | 0.09098039 |
| 53 | 3.50E+08 | 4.6    | 9.5  | 15 | Intact soil |      | 3.96  | 0.84       | 0.04596144 | 0.00483805 |



|    |          |     |       |    |                |          |      |            |            |
|----|----------|-----|-------|----|----------------|----------|------|------------|------------|
|    | 3.50E+08 | 4.6 | 9.5   | 30 | Intact soil    | 3.96     | 0.84 | 0.09534995 | 0.01003684 |
|    | 3.50E+08 | 4.6 | 9.5   | 45 | Intact soil    | 3.96     | 0.84 | 0.11499796 | 0.01210505 |
|    | 3.50E+08 | 4.6 | 15.33 | 15 | Intact soil    | 9.66     | 0.97 | 0.10767845 | 0.00702403 |
|    | 3.50E+08 | 4.6 | 15.33 | 30 | Intact soil    | 9.66     | 0.97 | 0.14700554 | 0.0095894  |
|    | 3.50E+08 | 4.6 | 15.33 | 45 | Intact soil    | 9.66     | 0.97 | 0.13138235 | 0.00857028 |
| 54 | 3.50E+08 | 1.1 | 2.495 | 15 | Disturbed soil | 0.95309  | 0.53 | 0.13609527 | 0.0545472  |
|    | 3.50E+08 | 1.1 | 2.495 | 30 | Disturbed soil | 0.95309  | 0.53 | 0.08328695 | 0.03338154 |
|    | 3.50E+08 | 1.1 | 2.495 | 45 | Disturbed soil | 0.95309  | 0.55 | 0.09138156 | 0.03662588 |
|    | 3.50E+08 | 1.1 | 7.083 | 15 | Intact soil    | 3.32901  | 0.53 | 0.10420466 | 0.01471194 |
|    | 3.50E+08 | 1.1 | 7.083 | 30 | Intact soil    | 3.32901  | 0.53 | 0.31255211 | 0.04412708 |
|    | 3.50E+08 | 1.1 | 7.083 | 45 | Intact soil    | 3.32901  | 0.55 | 0.22875674 | 0.03229659 |
|    | 3.50E+08 | 1.1 | 4.593 | 15 | Disturbed soil | 1.488132 | 0.42 | 0.34801161 | 0.07577    |
|    | 3.50E+08 | 1.1 | 4.593 | 30 | Disturbed soil | 1.488132 | 0.44 | 0.19022741 | 0.04141681 |
|    | 3.50E+08 | 1.1 | 4.593 | 45 | Disturbed soil | 1.488132 | 0.5  | 0.15721499 | 0.03422926 |
|    | 3.50E+08 | 1.1 | 6.15  | 15 | Intact soil    | 2.29395  | 0.42 | 0.29124048 | 0.04735618 |
|    | 3.50E+08 | 1.1 | 6.15  | 30 | Intact soil    | 2.29395  | 0.44 | 0.30561399 | 0.04969333 |
|    | 3.50E+08 | 1.1 | 6.15  | 45 | Intact soil    | 2.29395  | 0.5  | 0.274466   | 0.04462862 |
| 55 | 4.88E+04 | 0.5 | 34    | 25 | Intact soil    | 17.22    | 0.35 | 1.6286     | 0.0479     |
|    | 6.54E+04 | 0.5 | 37    | 25 | Intact soil    | 17.22    | 0.56 | 4.2513     | 0.1149     |
|    | 7.32E+04 | 0.5 | 38    | 25 | Intact soil    | 17.22    | 0.58 | 3.1882     | 0.0839     |
|    | 5.54E+04 | 0.5 | 39    | 25 | Intact soil    | 17.22    | 0.26 | 4.0287     | 0.1033     |

|    |          |      |            |      |             |     |          |      |            |            |
|----|----------|------|------------|------|-------------|-----|----------|------|------------|------------|
| 56 | 3.00E+03 | 1.1  | 0.722      | 20   | Intact soil |     | 0.26     | 0.48 | 0.016606   | 0.023      |
|    | 3.00E+03 | 0.75 | 0.743      | 40   | Intact soil |     | 0.26     | 0.36 | 0.0392304  | 0.0528     |
| 57 | 1.00E+08 | 0.4  | 87         | 18.2 | Disturbed   |     | 55.8     | 0.55 | 5.52202691 | 0.06347157 |
| 58 | 1.20E+06 | 7.5  | 5.29166667 | 50   | Disturbed   | 180 |          | 0.6  | 0.11548533 | 0.021824   |
|    | 1.20E+06 | 7.5  | 10.5833333 | 50   | Disturbed   | 180 |          | 0.6  | 0.215392   | 0.020352   |
|    | 1.20E+06 | 5.7  | 11.7083333 | 50   | Disturbed   | 500 | 4.17     | 2.7  | 0.2761106  | 0.0235824  |
|    | 1.20E+06 | 5.7  | 32.375     | 50   | Disturbed   | 500 | 4.17     | 2.7  | 0.56877954 | 0.01756848 |
| 59 | 5.20E+08 | 30   | 5.96       | 10   | Intact soil |     | 0.84     | 1.45 | 0.55209928 | 0.09263411 |
|    | 5.20E+08 | 30   | 4.73       | 10   | Intact soil |     | 1.01     | 1.56 | 0.53161894 | 0.11239301 |
| 60 | 3.50E+08 | 4.6  | 2.52       | 15   | Disturbed   |     | 0.95309  | 0.97 | 0.09740951 | 0.03865457 |
|    | 3.50E+08 | 4.6  | 2.52       | 30   | Disturbed   |     | 0.95309  | 0.97 | 0.07909512 | 0.03138695 |
|    | 3.50E+08 | 4.6  | 2.52       | 45   | Disturbed   |     | 0.95309  | 0.97 | 0.06932096 | 0.02750832 |
|    | 3.50E+08 | 4.6  | 15.42      | 15   | Intact soil |     | 9.66     | 0.97 | 0.06360792 | 0.00412503 |
|    | 3.50E+08 | 4.6  | 15.42      | 30   | Intact soil |     | 9.66     | 0.97 | 0.14786859 | 0.0095894  |
|    | 3.50E+08 | 4.6  | 15.42      | 45   | Intact soil |     | 9.66     | 0.97 | 0.12222061 | 0.00792611 |
|    | 3.50E+08 | 4.6  | 4.68       | 15   | Disturbed   |     | 1.488132 | 0.84 | 0.18090337 | 0.03865457 |
|    | 3.50E+08 | 4.6  | 4.68       | 30   | Disturbed   |     | 1.488132 | 0.84 | 0.10813096 | 0.02310491 |
|    | 3.50E+08 | 4.6  | 4.68       | 45   | Disturbed   |     | 1.488132 | 0.84 | 0.09022006 | 0.01927779 |
|    | 3.50E+08 | 4.6  | 11.34      | 15   | Intact soil |     | 3.96     | 0.84 | 0.03877773 | 0.00341955 |
|    | 3.50E+08 | 4.6  | 11.34      | 30   | Intact soil |     | 3.96     | 0.84 | 0.10373713 | 0.00914789 |
|    | 3.50E+08 | 4.6  | 11.34      | 45   | Intact soil |     | 3.96     | 0.84 | 0.12872806 | 0.01135168 |

---

|    |          |    |            |    |             |            |       |            |            |
|----|----------|----|------------|----|-------------|------------|-------|------------|------------|
| 61 | 4.60E+05 | 20 | 0.09416667 | 20 | Intact soil | 0.07541667 | 3.535 | 0.0134061  | 0.14236561 |
|    | 4.60E+05 | 20 | 0.34791667 | 20 | Intact soil | 0.27833333 | 3.285 | 0.01944498 | 0.05588976 |
|    | 4.60E+05 | 20 | 0.38666667 | 20 | Intact soil | 0.30916667 | 2.99  | 0.01340085 | 0.03465736 |

---

Table S2: (a) The performance of candidate models in predicting first-order attachment coefficient (one example and averaged values from 5-fold cross validation).

| Model ID                                             | RMSE     | MAE      |
|------------------------------------------------------|----------|----------|
| GBM_5_AutoML_5_20230329_213518                       | 6.876519 | 47.28651 |
| XGBoost_2_AutoML_5_20230329_213518                   | 7.20765  | 51.95022 |
| GBM_grid_1_AutoML_5_20230329_213518_model_2          | 7.316178 | 53.52646 |
| XGBoost_grid_1_AutoML_5_20230329_213518_model_3      | 7.476035 | 55.8911  |
| XGBoost_grid_1_AutoML_5_20230329_213518_model_2      | 7.52997  | 56.70045 |
| XGBoost_grid_1_AutoML_5_20230329_213518_model_1      | 7.598393 | 57.73557 |
| XGBoost_3_AutoML_5_20230329_213518                   | 7.751489 | 60.08558 |
| GBM_4_AutoML_5_20230329_213518                       | 7.849978 | 61.62216 |
| XRT_1_AutoML_5_20230329_213518                       | 7.931582 | 62.90999 |
| DeepLearning_grid_2_AutoML_5_20230329_213518_model_1 | 7.978416 | 63.65512 |
| GBM_3_AutoML_5_20230329_213518                       | 8.228532 | 67.70874 |
| GBM_2_AutoML_5_20230329_213518                       | 8.36859  | 70.03329 |
| XGBoost_1_AutoML_5_20230329_213518                   | 8.42557  | 70.99022 |
| DRF_1_AutoML_5_20230329_213518                       | 8.724111 | 76.11012 |
| DeepLearning_grid_3_AutoML_5_20230329_213518_model_1 | 9.753101 | 95.12297 |
| GBM_grid_1_AutoML_5_20230329_213518_model_1          | 9.774047 | 95.53199 |
| DeepLearning_grid_1_AutoML_5_20230329_213518_model_1 | 10.34111 | 106.9385 |
| GBM_1_AutoML_5_20230329_213518                       | 11.9224  | 142.1435 |
| DeepLearning_1_AutoML_5_20230329_213518              | 12.66608 | 160.4296 |
| GLM_1_AutoML_5_20230329_213518                       | 12.89371 | 166.2478 |
| GBM                                                  | 6.842156 | 46.94377 |
| XGBoost                                              | 6.802661 | 46.47265 |
| DeepLearning                                         | 8.781804 | 77.99138 |
| DRF                                                  | 8.347773 | 69.77396 |
| XRT                                                  | 8.130502 | 66.23638 |
| GLM                                                  | 12.97116 | 168.6133 |

Table S2: (b) The performance of candidate models in predicting spatial removal rate (one example and averaged values from 5-fold cross validation).

| Model ID                                             | RMSE     | MAE      |
|------------------------------------------------------|----------|----------|
| GBM_5_AutoML_3_20230331_225732                       | 0.066207 | 0.004383 |
| XGBoost_3_AutoML_3_20230331_225732                   | 0.06785  | 0.004604 |
| XGBoost_grid_1_AutoML_3_20230331_225732_model_2      | 0.073635 | 0.005422 |
| XGBoost_grid_1_AutoML_3_20230331_225732_model_3      | 0.074827 | 0.005599 |
| XGBoost_2_AutoML_3_20230331_225732                   | 0.076888 | 0.005912 |
| DRF_1_AutoML_3_20230331_225732                       | 0.08459  | 0.007156 |
| GBM_grid_1_AutoML_3_20230331_225732_model_2          | 0.085605 | 0.007328 |
| GBM_2_AutoML_3_20230331_225732                       | 0.087612 | 0.007676 |
| GBM_3_AutoML_3_20230331_225732                       | 0.088714 | 0.00787  |
| GBM_4_AutoML_3_20230331_225732                       | 0.090402 | 0.008172 |
| XGBoost_1_AutoML_3_20230331_225732                   | 0.092268 | 0.008513 |
| XRT_1_AutoML_3_20230331_225732                       | 0.101373 | 0.010276 |
| GBM_grid_1_AutoML_3_20230331_225732_model_1          | 0.113753 | 0.01294  |
| XGBoost_grid_1_AutoML_3_20230331_225732_model_1      | 0.115458 | 0.01333  |
| DeepLearning_grid_2_AutoML_3_20230331_225732_model_1 | 0.126975 | 0.016123 |
| DeepLearning_grid_1_AutoML_3_20230331_225732_model_1 | 0.131267 | 0.017231 |
| DeepLearning_grid_3_AutoML_3_20230331_225732_model_1 | 0.142589 | 0.020332 |
| GBM_1_AutoML_3_20230331_225732                       | 0.146386 | 0.021429 |
| GLM_1_AutoML_3_20230331_225732                       | 0.147182 | 0.021663 |
| DeepLearning_1_AutoML_3_20230331_225732              | 0.149172 | 0.022252 |
| GBM                                                  | 0.067772 | 0.005586 |
| XGBoost                                              | 0.067376 | 0.005509 |
| DeepLearning                                         | 0.098221 | 0.011626 |
| DRF                                                  | 0.080607 | 0.007842 |
| XRT                                                  | 0.083007 | 0.008277 |
| GLM                                                  | 0.116385 | 0.016353 |

Code in R used for training H2O AutoML.

```
# Start H2O AutoML
library(h2o)
h2o.init()
# Import training datasets and testing datasets
train <- h2o.importFile("G:/Chen Fengxian 2022.4.27/ML/EcoliML/AML/FAC-train.csv")
test <- h2o.importFile("G:/Chen Fengxian 2022.4.27/ML/EcoliML/AML/FAC-test.csv")
# Name the input variables and target variables
y <- "AC"
x <- setdiff(names(train), y)
print(x)
print(y)
# Define the porous medium type as categorical variable
train["PM"] <- as.factor(train["PM"])
test["PM"] <- as.factor(test["PM"])
# Model training
aml <- h2o.automl(x = x, y = y,
                 training_frame = train,
                 max_models = 20,
                 seed = 1)
# Print the leaderboard according to the model performance
lb <- aml@leaderboard
print(lb, n = nrow(lb))
#Print the predicted results
pred <- h2o.predict(aml@leader, test)
print(pred, n = nrow(pred))
#Print the variable importance of the best model
varimp <- h2o.varimp(aml)
print (varimp)
#Get the best model based on its ID
```

```
gbm5 <- h2o.getModel ("GBM_5_AutoML_1_20221215_164033")  
#Plot the SHAP summary plot of the best tree-based model  
shap_summary_plot <- h2o.shap_summary_plot (gbm5, test)  
print(shap_summary_plot)
```

## Reference

1. Wang, S., Zhang, M., He, L., Li, M., Zhang, X., Liu, F. and Tong, M., 2022. Bacterial Capture and Inactivation in Sand Filtration Systems With Addition of Zero-valent Iron As Permeable Layer Under Both Slow and Fast Filtration Conditions. *Journal of Hazardous Materials*, p.129122.
2. He, L., Li, M., Wu, D., Guo, J., Zhang, M. and Tong, M., 2022. Freeze-Thaw Cycles Induce Diverse Bacteria Release Behaviors from Quartz Sand Columns with Different Water Saturations. *Water Research*, p.118683.
3. Yang, L., Kang, J., Chen, X., Ripp, S.A., Johnson, W.P. and Zhuang, J., 2021. Real-time bioluminescent imaging of spatiotemporal variation of microbial retention during transport through porous media under variably saturated flow conditions. *Journal of Hydrology*, 601, p.126603.
4. Park, S.J., Kim, S.B. and Kim, K.W., 2010. Analysis of bacterial cell properties and transport in porous media. *Journal of Environmental Science and Health Part A*, 45(6), pp.682-691.
5. Sasidharan, S., Bradford, S.A., Torkzaban, S., Ye, X., Vanderzalm, J., Du, X. and Page, D., 2017. Unraveling the complexities of the velocity dependency of E. coli retention and release parameters in saturated porous media. *Science of the Total Environment*, 603, pp.406-415.
6. Wu, D., He, L., Sun, R., Tong, M. and Kim, H., 2017. Influence of Bisphenol A on the transport and deposition behaviors of bacteria in quartz sand. *Water research*, 121, pp.1-10.
7. Madumathi, G., Philip, L. and Bhallamudi, S.M., 2017. Transport of E. coli in saturated and unsaturated porous media: effect of physiological state and substrate availability. *Sādhanā*, 42, pp.1007-1024.
8. He, L., Wu, D., Rong, H., Li, M., Tong, M. and Kim, H., 2018. Influence of nano-and microplastic particles on the transport and deposition behaviors of bacteria in quartz sand. *Environmental Science & Technology*, 52(20), pp.11555-11563.
9. Hong, Z.N., Jiang, J., Li, J.Y., Xu, R.K. and Yan, J., 2019. Adhesion mediated transport of bacterial pathogens in saturated sands coated by phyllosilicates and Al-oxides. *Colloids and Surfaces B: Biointerfaces*, 181, pp.215-225.
10. Bai, H., Chen, J., Gao, W., Yang, B., Yan, Y., Liu, W., Wang, G. and Lamy, E., 2021. Transport and retention of bacteria through a filtration system consisting of sands and geotextiles. *Colloids and Surfaces B: Biointerfaces*, 208, p.112114.
11. Du, M., Wang, L., Ebrahimi, A., Chen, G., Shu, S., Zhu, K., Shen, C., Li, B. and Wang, G., 2021. Extracellular polymeric substances induced cell-surface interactions facilitate bacteria transport in saturated porous media. *Ecotoxicology and Environmental Safety*, 218, p.112291.
12. Gao, M., Peng, H. and Xiao, L., 2021. The influence of microplastics for the transportation of E. coli using column model. *Science of The Total Environment*, 786, p.147487.
13. Zhang, M., He, L., Jin, X., Bai, F., Tong, M. and Ni, J., 2021. Flagella and their properties affect the transport and deposition behaviors of Escherichia coli in quartz sand. *Environmental Science & Technology*, 55(8), pp.4964-4973.
14. Zhang, D. and Prigiobbe, V., 2022. Measuring and modeling the influence of salinity change on the transport behaviour of Escherichia coli through quartz sand. *Journal of Contaminant Hydrology*, 248, p.104016.
15. Dong, Z., Yang, H., Wu, D., Ni, J., Kim, H. and Tong, M., 2014. Influence of silicate on the transport of bacteria in quartz sand and iron mineral-coated sand. *Colloids and Surfaces B: Biointerfaces*, 123, pp.995-1002.
16. Li, J., Zhao, X., Tian, X., Li, J., Sjollema, J. and Wang, A., 2015. Retention in treated wastewater affects survival and deposition of Staphylococcus aureus and Escherichia



- coli in sand columns. *Applied and environmental microbiology*, 81(6), pp.2199-2205.
17. Bai, H., Cochet, N., Pauss, A. and Lamy, E., 2016. Bacteria cell properties and grain size impact on bacteria transport and deposition in porous media. *Colloids and Surfaces B: Biointerfaces*, 139, pp.148-155.
  18. Shen, X., Han, P., Yang, H., Kim, H. and Tong, M., 2013. Influence of sulfate on the transport of bacteria in quartz sand. *Colloids and Surfaces B: Biointerfaces*, 110, pp.443-449.
  19. Yang, H., Kim, H. and Tong, M., 2012. Influence of humic acid on the transport behavior of bacteria in quartz sand. *Colloids and Surfaces B: Biointerfaces*, 91, pp.122-129.
  20. Kim, H.N. and Walker, S.L., 2009. Escherichia coli transport in porous media: Influence of cell strain, solution chemistry, and temperature. *Colloids and Surfaces B: Biointerfaces*, 71(1), pp.160-167.
  21. Bradford, S.A., Simunek, J. and Walker, S.L., 2006. Transport and straining of E. coli O157: H7 in saturated porous media. *Water Resources Research*, 42(12).
  22. Liu, J., Ford, R.M. and Smith, J.A., 2011. Idling time of motile bacteria contributes to retardation and dispersion in sand porous medium. *Environmental science & technology*, 45(9), pp.3945-3951.
  23. Sasidharan, S., Torkzaban, S., Bradford, S.A., Kookana, R., Page, D. and Cook, P.G., 2016. Transport and retention of bacteria and viruses in biochar-amended sand. *Science of the Total Environment*, 548, pp.100-109.
  24. Chung, J.W., Foppen, J.W., Izquierdo, M. and Lens, P.N., 2014. Removal of Escherichia coli from saturated sand columns supplemented with hydrochar produced from maize. *Journal of environmental quality*, 43(6), pp.2096-2103.
  25. Walczak, J.J., Wang, L., Feriencikova, L., Li, J. and Xu, S., 2012. Influence of desiccation on the transport of Escherichia coli through saturated sand packs. *Water, Air, & Soil Pollution*, 223, pp.1353-1362.
  26. Syngouna, V.I. and Chrysikopoulos, C.V., 2011. Transport of biocolloids in water saturated columns packed with sand: Effect of grain size and pore water velocity. *Journal of Contaminant Hydrology*, 126(3-4), pp.301-314.
  27. Walczak, J.J., Wang, L., Bardy, S.L., Feriencikova, L., Li, J. and Xu, S., 2012. The effects of starvation on the transport of Escherichia coli in saturated porous media are dependent on pH and ionic strength. *Colloids and surfaces B: Biointerfaces*, 90, pp.129-136.
  28. Walczak, J.J., Bardy, S.L., Feriencikova, L. and Xu, S., 2011. Influence of tetracycline resistance on the transport of manure-derived Escherichia coli in saturated porous media. *Water Research*, 45(4), pp.1681-1690.
  29. Kim, S.B., Park, S.J., Lee, C.G. and Kim, H.C., 2008. Transport and retention of Escherichia coli in a mixture of quartz, Al - coated and Fe - coated sands. *Hydrological Processes: An International Journal*, 22(18), pp.3856-3863.
  30. Torkzaban, S., Tazehkand, S.S., Walker, S.L. and Bradford, S.A., 2008. Transport and fate of bacteria in porous media: Coupled effects of chemical conditions and pore space geometry. *Water Resources Research*, 44(4).
  31. Jiang, G., Noonan, M.J., Buchan, G.D. and Smith, N., 2007. Transport of Escherichia coli through variably saturated sand columns and modeling approaches. *Journal of Contaminant Hydrology*, 93(1-4), pp.2-20.
  32. Bolster, C.H., Walker, S.L. and Cook, K.L., 2006. Comparison of Escherichia coli and Campylobacter jejuni transport in saturated porous media. *Journal of environmental quality*, 35(4), pp.1018-1025.

33. Redman, J.A., Walker, S.L. and Elimelech, M., 2004. Bacterial adhesion and transport in porous media: Role of the secondary energy minimum. *Environmental science & technology*, 38(6), pp.1777-1785.
34. Zhang, X., Chen, F., Yang, L., Qin, F. and Zhuang, J., 2022. Quantifying bacterial concentration in water and sand media during flow-through experiments using a non-invasive, real-time, and efficient method. *Frontiers in Microbiology*, 13.
35. Tazehkand, S.S., Torkzaban, S., Bradford, S.A. and Walker, S.L., 2008. Cell preparation methods influence Escherichia coli D21g surface chemistry and transport in saturated sand. *Journal of environmental quality*, 37(6), pp.2108-2115.
36. Foppen, J.W., Van Herwerden, M. and Schijven, J., 2007. Measuring and modelling straining of Escherichia coli in saturated porous media. *Journal of contaminant hydrology*, 93(1-4), pp.236-254.
37. Wang, Y., Bradford, S.A. and Šimůnek, J., 2013. Transport and fate of microorganisms in soils with preferential flow under different solution chemistry conditions. *Water resources research*, 49(5), pp.2424-2436.
38. Eisfeld, C., Schijven, J.F., van der Wolf, J.M., Medema, G., Kruisdijk, E. and van Breukelen, B.M., 2022. Removal of bacterial plant pathogens in columns filled with quartz and natural sediments under anoxic and oxygenated conditions. *Water Research*, 220, p.118724.
39. Chalotra, A., Ratha, D., Babbar, R. and Baranwal, M., 2022. A study on transport of Escherichia coli through saturated porous medium. *International Journal of Environmental Science and Technology*, pp.1-16.
40. Lutterodt, G., Foppen, J.W.A. and Uhlenbrook, S., 2012. Transport of Escherichia coli strains isolated from natural spring water. *Journal of contaminant hydrology*, 140, pp.12-20.
41. Lutterodt, G., Foppen, J.W.A., Maksoud, A. and Uhlenbrook, S., 2011. Transport of Escherichia coli in 25 m quartz sand columns. *Journal of contaminant hydrology*, 119(1-4), pp.80-88.
42. Powelson, D.K. and Mills, A.L., 2001. Transport of Escherichia coli in sand columns with constant and changing water contents. *Journal of environmental quality*, 30(1), pp.238-245.
43. Wang, L., Xu, S. and Li, J., 2011. Effects of phosphate on the transport of Escherichia coli O157: H7 in saturated quartz sand. *Environmental science & technology*, 45(22), pp.9566-9573.
44. Johanson, J.J., Feriencikova, L., Banerjee, A., Saffarini, D.A., Wang, L., Li, J., Grundl, T.J. and Xu, S., 2014. Comparison of the transport of Bacteroides fragilis and Escherichia coli within saturated sand packs. *Colloids and Surfaces B: Biointerfaces*, 123, pp.439-445.
45. Bai, H., Cochet, N., Drelich, A., Pauss, A. and Lamy, E., 2016. Comparison of transport between two bacteria in saturated porous media with distinct pore size distribution. *Rsc Advances*, 6(18), pp.14602-14614.
46. Yao, S.Y., Yuan, X.M., Yang, X.Y. and Deng, S.H., 2016. Effects of particle size and pore water velocity on transport of Escherichia coli in saturated porous media. *Journal of Agro-Environment Science*, 35(02), pp.353-357.
47. Haznedaroglu, B.Z., Bolster, C.H. and Walker, S.L., 2008. The role of starvation on Escherichia coli adhesion and transport in saturated porous media. *Water research*, 42(6-7), pp.1547-1554.
48. Abu-Lail, N.I. and Camesano, T.A., 2003. Role of lipopolysaccharides in the adhesion, retention, and transport of Escherichia coli JM109. *Environmental science &*

*technology*, 37(10), pp.2173-2183.

49. Won, J., Kim, J.W., Kang, S. and Choi, H., 2007. Transport and adhesion of Escherichia coli JM109 in soil aquifer treatment (SAT): One-dimensional column study. *Environmental monitoring and assessment*, 129, pp.9-18.
50. Chen, J., Yang, L., Chen, X., Ripp, S., Radosevich, M. and Zhuang, J., 2021. Bacterial mobility facilitated by soil depth and intact structure. *Soil and Tillage Research*, 209, p.104911.
51. Chen, J., Yang, L., Chen, X., Ripp, S. and Zhuang, J., 2022. Coupled effects of pore water velocity and soil heterogeneity on bacterial transport: intact vs. repacked soils. *Frontiers in Microbiology*, 13.
52. Park, S.J., Kim, S.B. and Kim, K.W., 2010. Analysis of bacterial cell properties and transport in porous media. *Journal of Environmental Science and Health Part A*, 45(6), pp.682-691.
53. Gharabaghi, B., Safadoust, A., Mahboubi, A.A., Mosaddeghi, M.R., Unc, A., Ahrens, B. and Sayyad, G., 2015. Temperature effect on the transport of bromide and E. coli NAR in saturated soils. *Journal of Hydrology*, 522, pp.418-427.
54. Safadoust, A., Mahboubi, A.A., Mosaddeghi, M.R., Gharabaghi, B., Voroney, P., Unc, A. and Khodakaramian, G., 2012. Significance of physical weathering of two-texturally different soils for the saturated transport of Escherichia coli and bromide. *Journal of environmental management*, 107, pp.147-158.
55. Sepehrnia, N., Mahboubi, A.A., Mosaddeghi, M.R., Sinejani, A.S. and Khodakaramian, G., 2014. Escherichia coli transport through intact gypsiferous and calcareous soils during saturated and unsaturated flows. *Geoderma*, 217, pp.83-89.
56. Mosaddeghi, M.R., Sinegani, A.S., Farhangi, M.B., Mahboubi, A.A. and Unc, A., 2010. Saturated and unsaturated transport of cow manure-borne Escherichia coli through in situ clay loam lysimeters. *Agriculture, ecosystems & environment*, 137(1-2), pp.163-171.
57. Sepehrnia, N., Bachmann, J., Hajabbasi, M.A., Rezanezhad, F., Lichner, L., Hallett, P.D. and Coyne, M., 2019. Transport, retention, and release of Escherichia coli and Rhodococcus erythropolis through dry natural soils as affected by water repellency. *Science of The Total Environment*, 694, p.133666.
58. Hijnen, W.A., Brouwer-Hanzens, A.J., Charles, K.J. and Medema, G.J., 2005. Transport of MS2 phage, Escherichia coli, Clostridium perfringens, Cryptosporidium parvum, and Giardia intestinalis in a gravel and a sandy soil. *Environmental science & technology*, 39(20), pp.7860-7868.
59. Firouzi, A.F., Homaei, M., Klumpp, E., Kasteel, R. and Tappe, W., 2015. Bacteria transport and retention in intact calcareous soil columns under saturated flow conditions. *Journal of Hydrology and Hydromechanics*, 63(2), pp.102-109.
60. Safadoust, A., Mahboubi, A.A., Gharabaghi, B., Mosaddeghi, M.R., Voroney, P., Unc, A. and Sayyad, G., 2011. Bacterial filtration rates in repacked and weathered soil columns. *Geoderma*, 167, pp.204-213.
61. Guber, A.K., Shelton, D.R. and Pachepsky, Y.A., 2005. Transport and retention of manure-borne coliforms in soil. *Vadose Zone Journal*, 4(3), pp.828-837.
